# Supplementary material
Source: Frontiers journal article supplement (https://www.frontiersin.org/articles/180706)
Supplement: Appendix_A.pdf [file Appendix_A.pdf]

## Supplementary Material

### Developmental Dynamics of General and School-Subject-Specific Components of Academic Self-Concept, Academic Interest, and Academic Anxiety

Katarzyna Gogol\*, Martin Brunner, Franzis Preckel, Thomas Goetz, Romain Martin

\* **Correspondence:** Katarzyna Gogol: katarzyna.gogol@fu-berlin.de

Table A1

*Items Assessing Academic Self-Concepts, Academic Interests, and Academic Anxieties*

---

*General academic self-concept*

|       |                                                 |
|-------|-------------------------------------------------|
| SC_A1 | I do well on tests in most school subjects.     |
| SC_A2 | I learn things quickly in most school subjects. |
| SC_A3 | I am good at most school subjects.              |

---

*Subject-specific academic self-concepts*

|         |                                       |
|---------|---------------------------------------|
| SC_[S]1 | [SUBJECT] is one of my best subjects. |
| SC_[S]2 | I learn things quickly in [SUBJECT].  |
| SC_[S]3 | I am good at [SUBJECT].               |

---

*General academic interest*

|        |                                                      |
|--------|------------------------------------------------------|
| INT_A1 | I am interested in most school subjects.             |
| INT_A2 | Most school subjects are important to me personally. |
| INT_A3 | I enjoy most school subjects.                        |

---

*Subject-specific academic interests*

|          |                                          |
|----------|------------------------------------------|
| INT_[S]1 | I am interested in [SUBJECT].            |
| INT_[S]2 | [SUBJECT] is important to me personally. |
| INT_[S]3 | I enjoy [SUBJECT].                       |

---

*General academic anxiety*

|        |                                                          |
|--------|----------------------------------------------------------|
| ANX_A1 | I am afraid of most school subjects.                     |
| ANX_A2 | I get very nervous before tests in most school subjects. |
| ANX_A3 | I am worried before tests in most school subjects.       |

---

*Subject-specific academic anxieties*

|          |                                               |
|----------|-----------------------------------------------|
| ANX_[S]1 | I am afraid of [SUBJECT] class.               |
| ANX_[S]2 | I get very nervous before tests in [SUBJECT]. |
| ANX_[S]3 | I am worried before tests in [SUBJECT].       |

---

*Note.* To assess subject-specific constructs, [SUBJECT] was replaced by mathematics, French, or German, respectively.

<sup>a</sup> Students responded to these items on a rating scale with four categories: *disagree*, *disagree somewhat*, *agree somewhat*, and *agree*.

Table A2

*Sample 1: Descriptive Statistics, Correlations (below the Diagonal), and Covariances (above the Diagonal) for the Scale Scores Assessing Academic Self-Concept, Interest, and Anxiety*

|               |           | Grade 7 |      |      |      |      |      |      |      |      |      |      |      | Grade 9 |      |      |      |      |      |      |      |      |      |      |      |
|---------------|-----------|---------|------|------|------|------|------|------|------|------|------|------|------|---------|------|------|------|------|------|------|------|------|------|------|------|
|               |           | SA      | SM   | SF   | SG   | IA   | IM   | IF   | IG   | AA   | AM   | AF   | AG   | SA      | SM   | SF   | SG   | IA   | IM   | IF   | IG   | AA   | AM   | AF   | AG   |
| Seventh grade | SA        | -       | .21  | .14  | .20  | .17  | .15  | .09  | .15  | -.14 | -.13 | -.10 | -.11 | .12     | .09  | .04  | .10  | .06  | .06  | .01  | .06  | -.06 | -.04 | -.02 | -.06 |
|               | SM        | .42     | -    | -.03 | .03  | .14  | .52  | -.02 | .03  | -.16 | -.42 | .00  | -.02 | .09     | .38  | -.09 | .00  | .04  | .29  | -.07 | -.01 | -.08 | -.23 | .04  | -.01 |
|               | SF        | .26     | -.04 | -    | -.21 | .10  | -.01 | .54  | -.13 | -.03 | .07  | -.36 | .20  | .06     | -.04 | .53  | -.23 | .06  | -.02 | .38  | -.13 | .02  | .08  | -.23 | .18  |
|               | SG        | .39     | .03  | -.28 | -    | .12  | .01  | -.16 | .51  | -.14 | -.03 | .07  | -.40 | .10     | -.06 | -.27 | .43  | .03  | -.05 | -.21 | .29  | -.10 | .00  | .10  | -.28 |
|               | IA        | .43     | .24  | .17  | .20  | -    | .27  | .25  | .26  | -.03 | -.03 | -.02 | .00  | .09     | .08  | .06  | .06  | .18  | .14  | .12  | .13  | .02  | .01  | .02  | .02  |
|               | IM        | .29     | .72  | -.02 | .01  | .47  | -    | .14  | .16  | -.07 | -.28 | .04  | .04  | .07     | .32  | -.05 | -.01 | .12  | .33  | .03  | .07  | -.02 | -.16 | .05  | .03  |
|               | IF        | .18     | -.02 | .71  | -.22 | .44  | .19  | -    | .05  | .03  | .10  | -.23 | .20  | .05     | -.01 | .42  | -.18 | .14  | .08  | .40  | -.03 | .07  | .08  | -.15 | .18  |
|               | IG        | .29     | .04  | -.18 | .70  | .46  | .22  | .07  | -    | -.05 | .03  | .10  | -.24 | .08     | -.03 | -.16 | .31  | .13  | .04  | -.07 | .32  | -.03 | .03  | .09  | -.15 |
|               | AA        | -.28    | -.23 | -.04 | -.20 | -.05 | -.10 | .04  | -.07 | -    | .47  | .41  | .41  | -.09    | -.10 | .03  | -.09 | .00  | -.03 | .06  | -.02 | .26  | .23  | .15  | .20  |
|               | AM        | -.24    | -.57 | .09  | -.04 | -.05 | -.38 | .13  | .04  | .66  | -    | .29  | .29  | -.08    | -.28 | .10  | -.03 | .01  | -.17 | .11  | .02  | .22  | .32  | .09  | .13  |
|               | AF        | -.19    | .00  | -.47 | .10  | -.03 | .05  | -.31 | .14  | .59  | .39  | -    | .19  | -.07    | -.02 | -.25 | .08  | -.01 | .01  | -.15 | .08  | .17  | .12  | .29  | .04  |
|               | AG        | -.22    | -.03 | .26  | -.55 | -.01 | .06  | .28  | -.33 | .60  | .39  | .26  | -    | -.07    | .01  | .23  | -.28 | .02  | .06  | .21  | -.13 | .21  | .13  | .03  | .34  |
| Ninth grade   | SA        | .34     | .18  | .12  | .19  | .22  | .15  | .09  | .16  | -.18 | -.15 | -.13 | -.13 | -       | .22  | .14  | .19  | .20  | .18  | .11  | .14  | -.06 | -.04 | -.01 | -.05 |
|               | SM        | .16     | .49  | -.05 | -.07 | .13  | .41  | -.01 | -.03 | -.13 | -.34 | -.03 | .02  | .39     | -    | -.02 | -.02 | .16  | .62  | .01  | -.01 | -.07 | -.39 | .06  | .06  |
|               | SF        | .06     | -.11 | .64  | -.33 | .09  | -.06 | .52  | -.20 | .04  | .12  | -.31 | .28  | .24     | -.02 | -    | -.23 | .14  | .03  | .60  | -.09 | .07  | .16  | -.31 | .26  |
|               | SG        | .19     | .00  | -.30 | .58  | .10  | -.01 | -.24 | .42  | -.13 | -.04 | .10  | -.38 | .36     | -.02 | -.28 | -    | .13  | .02  | -.14 | .50  | -.07 | .06  | .17  | -.32 |
|               | IA        | .16     | .07  | .10  | .06  | .39  | .21  | .24  | .22  | .00  | .01  | -.02 | .04  | .48     | .25  | .22  | .21  | -    | .28  | .27  | .27  | .06  | .06  | .07  | .07  |
|               | IM        | .11     | .37  | -.03 | -.06 | .24  | .43  | .10  | .05  | -.05 | -.22 | .01  | .07  | .32     | .73  | .03  | .02  | .45  | -    | .16  | .15  | .03  | -.22 | .10  | .11  |
|               | IF        | .03     | -.09 | .48  | -.27 | .20  | .03  | .53  | -.09 | .09  | .14  | -.20 | .27  | .21     | .01  | .72  | -.19 | .45  | .19  | -    | .07  | .14  | .19  | -.14 | .27  |
|               | IG        | .12     | -.01 | -.17 | .39  | .23  | .09  | -.04 | .44  | -.03 | .03  | .10  | -.18 | .28     | -.01 | -.11 | .66  | .46  | .19  | .10  | -    | .04  | .14  | .18  | -.12 |
|               | AA        | -.13    | -.12 | .03  | -.14 | .04  | -.02 | .10  | -.04 | .40  | .33  | .26  | .31  | -.12    | -.10 | .10  | -.10 | .12  | .04  | .20  | .06  | -    | .46  | .36  | .40  |
|               | AM        | -.07    | -.30 | .10  | .00  | .02  | -.20 | .10  | .04  | .31  | .41  | .16  | .17  | -.08    | -.47 | .18  | .08  | .10  | -.26 | .23  | .18  | .65  | -    | .29  | .30  |
|               | AF        | -.04    | .06  | -.31 | .13  | .03  | .07  | -.20 | .13  | .22  | .13  | .39  | .04  | -.03    | .08  | -.38 | .23  | .12  | .13  | -.18 | .24  | .54  | .37  | -    | .18  |
|               | AG        | -.12    | -.01 | .24  | -.39 | .04  | .05  | .25  | -.21 | .29  | .19  | .05  | .48  | -.10    | .07  | .33  | -.45 | .13  | .14  | .37  | -.17 | .61  | .40  | .26  | -    |
|               | <i>M</i>  | 3.03    | 2.95 | 2.74 | 2.98 | 3.09 | 3.03 | 2.87 | 2.91 | 2.08 | 1.98 | 1.98 | 1.88 | 2.86    | 2.60 | 2.51 | 2.84 | 2.70 | 2.65 | 2.59 | 2.61 | 2.13 | 2.22 | 2.09 | 1.88 |
|               | <i>SD</i> | .60     | .85  | .88  | .86  | .67  | .85  | .86  | .85  | .81  | .87  | .85  | .85  | .60     | .93  | .94  | .87  | .69  | .91  | .88  | .86  | .78  | .90  | .86  | .83  |
|               | <i>ω</i>  | .76     | .90  | .90  | .89  | .74  | .86  | .86  | .87  | .80  | .82  | .83  | .83  | .77     | .90  | .91  | .89  | .76  | .87  | .87  | .87  | .79  | .83  | .82  | .82  |

*Note.* Scale scores for academic self-concepts, interests, and anxieties were computed as the mean of the respective item scores.

Reliability estimates were calculated as coefficient  $\omega$  (McDonald, 1999) and were based on congeneric first-order factor models.  $\omega$  can be interpreted in the same way as any other reliability coefficient, with values that can range from 0 (no reliability) to 1 (perfect reliability).

SA = academic self-concept; SM = mathematics self-concept; SF = French self-concept; SG = German self-concept; IA = academic interest; IM = mathematics interest; IF = French interest; IG = German interest; AA = academic anxiety; AM = mathematics anxiety; AF = French anxiety; AG = German anxiety.



Table A3

Sample 2: Descriptive Statistics, Correlations (below the Diagonal), and Covariances (above the Diagonal) for the Scale Scores Assessing Academic Self-Concept, Interest, and Anxiety

|               |           | Grade 7 |      |      |      |      |      |      |      |      |      |      |      | Grade 9 |      |      |      |      |      |      |      |      |      |      |      |
|---------------|-----------|---------|------|------|------|------|------|------|------|------|------|------|------|---------|------|------|------|------|------|------|------|------|------|------|------|
|               |           | SA      | SM   | SF   | SG   | IA   | IM   | IF   | IG   | AA   | AM   | AF   | AG   | SA      | SM   | SF   | SG   | IA   | IM   | IF   | IG   | AA   | AM   | AF   | AG   |
|               |           |         |      |      |      |      |      |      |      |      |      |      |      |         |      |      |      |      |      |      |      |      |      |      |      |
| Seventh grade | SA        | -       | .22  | .13  | .17  | .16  | .15  | .09  | .11  | -.15 | -.16 | -.10 | -.12 | .13     | .11  | .04  | .09  | .06  | .08  | .01  | .04  | -.08 | -.07 | -.04 | -.07 |
|               | SM        | .43     | -    | -.03 | .00  | .12  | .52  | -.03 | .00  | -.17 | -.47 | .00  | -.01 | .11     | .41  | -.05 | -.03 | .04  | .29  | -.06 | -.05 | -.10 | -.27 | .00  | .00  |
|               | SF        | .25     | -.03 | -    | -.20 | .11  | .01  | .53  | -.13 | -.02 | .06  | -.37 | .21  | .07     | -.05 | .52  | -.21 | .07  | -.02 | .38  | -.13 | .02  | .09  | -.25 | .16  |
|               | SG        | .35     | -.01 | -.27 | -    | .10  | -.02 | -.14 | .47  | -.15 | -.01 | .09  | -.43 | .07     | -.05 | -.27 | .40  | .02  | -.04 | -.19 | .26  | -.09 | .01  | .10  | -.28 |
|               | IA        | .41     | .21  | .19  | .18  | -    | .24  | .24  | .22  | -.01 | -.02 | -.01 | .01  | .08     | .06  | .06  | .05  | .15  | .11  | .11  | .11  | .02  | .02  | .00  | .02  |
|               | IM        | .30     | .71  | .01  | -.03 | .44  | -    | .14  | .11  | -.08 | -.30 | .03  | .05  | .08     | .32  | .00  | -.04 | .11  | .31  | .05  | .01  | -.04 | -.17 | .02  | .05  |
|               | IF        | .18     | -.04 | .71  | -.20 | .43  | .19  | -    | .04  | .03  | .10  | -.24 | .20  | .04     | -.04 | .40  | -.15 | .14  | .04  | .38  | -.03 | .06  | .11  | -.15 | .15  |
|               | IG        | .23     | .00  | -.18 | .68  | .41  | .16  | .05  | -    | -.05 | .05  | .12  | -.25 | .05     | -.05 | -.15 | .27  | .09  | .02  | -.06 | .28  | -.01 | .06  | .10  | -.13 |
|               | AA        | -.31    | -.24 | -.03 | -.21 | -.02 | -.12 | .05  | -.07 | -    | .49  | .42  | .44  | -.10    | -.13 | .04  | -.10 | .01  | -.05 | .09  | -.01 | .30  | .27  | .18  | .23  |
|               | AM        | -.29    | -.60 | .07  | -.02 | -.04 | -.39 | .13  | .06  | .65  | -    | .30  | .29  | -.10    | -.31 | .08  | -.02 | .01  | -.18 | .12  | .05  | .26  | .38  | .14  | .15  |
|               | AF        | -.18    | .00  | -.48 | .12  | -.01 | .05  | -.32 | .16  | .57  | .37  | -    | .18  | -.08    | -.02 | -.27 | .08  | -.01 | .02  | -.16 | .09  | .20  | .13  | .32  | .06  |
|               | AG        | -.23    | -.01 | .27  | -.59 | .01  | .07  | .26  | -.34 | .61  | .37  | .24  | -    | -.06    | .01  | .24  | -.31 | .03  | .05  | .22  | -.15 | .24  | .17  | .05  | .36  |
| Ninth grade   | SA        | .37     | .22  | .14  | .15  | .20  | .16  | .09  | .10  | -.21 | -.18 | -.16 | -.13 | -       | .21  | .14  | .16  | .17  | .16  | .10  | .11  | -.09 | -.07 | -.04 | -.06 |
|               | SM        | .19     | .50  | -.06 | -.07 | .10  | .40  | -.05 | -.06 | -.16 | -.37 | -.02 | .01  | .39     | -    | -.03 | -.03 | .14  | .62  | -.02 | -.02 | -.09 | -.43 | .06  | .06  |
|               | SF        | .06     | -.06 | .64  | -.34 | .11  | .00  | .50  | -.20 | .05  | .10  | -.33 | .30  | .26     | -.03 | -    | -.22 | .15  | .01  | .60  | -.10 | .06  | .14  | -.32 | .25  |
|               | SG        | .18     | -.04 | -.29 | .57  | .08  | -.06 | -.22 | .39  | -.15 | -.02 | .11  | -.42 | .33     | -.03 | -.28 | -    | .10  | .00  | -.15 | .44  | -.09 | .05  | .13  | -.35 |
|               | IA        | .14     | .06  | .13  | .03  | .36  | .19  | .24  | .17  | .03  | .02  | -.02 | .06  | .44     | .23  | .24  | .19  | -    | .26  | .27  | .24  | .05  | .05  | .04  | .06  |
|               | IM        | .14     | .37  | -.03 | -.06 | .20  | .40  | .06  | .03  | -.06 | -.22 | .02  | .07  | .31     | .73  | .02  | .00  | .44  | -    | .13  | .13  | .00  | -.24 | .11  | .11  |
|               | IF        | .02     | -.07 | .49  | -.26 | .20  | .07  | .51  | -.08 | .12  | .15  | -.20 | .29  | .20     | -.02 | .73  | -.20 | .47  | .17  | -    | .07  | .13  | .19  | -.15 | .25  |
|               | IG        | .08     | -.07 | -.18 | .38  | .20  | .01  | -.04 | .41  | -.02 | .07  | .12  | -.21 | .23     | -.03 | -.13 | .64  | .45  | .17  | .10  | -    | .03  | .12  | .15  | -.15 |
|               | AA        | -.17    | -.15 | .03  | -.14 | .03  | -.06 | .08  | -.01 | .47  | .37  | .29  | .35  | -.19    | -.13 | .08  | -.14 | .09  | .00  | .19  | .04  | -    | .46  | .37  | .41  |
|               | AM        | -.13    | -.34 | .11  | .01  | .03  | -.22 | .14  | .08  | .36  | .47  | .17  | .21  | -.14    | -.51 | .17  | .06  | .08  | -.29 | .24  | .16  | .65  | -    | .26  | .28  |
|               | AF        | -.08    | .00  | -.33 | .14  | .00  | .02  | -.21 | .14  | .26  | .18  | .43  | .06  | -.09    | .07  | -.41 | .18  | .07  | .14  | -.21 | .22  | .56  | .34  | -    | .19  |
|               | AG        | -.14    | .00  | .22  | -.40 | .04  | .07  | .21  | -.19 | .34  | .20  | .08  | .50  | -.12    | .07  | .32  | -.51 | .11  | .14  | .35  | -.22 | .63  | .38  | .27  | -    |
|               | <i>M</i>  | 3.01    | 2.94 | 2.76 | 2.95 | 3.14 | 3.07 | 2.97 | 2.96 | 2.12 | 2.01 | 1.99 | 1.92 | 2.89    | 2.64 | 2.54 | 2.88 | 2.78 | 2.71 | 2.62 | 2.69 | 2.16 | 2.22 | 2.09 | 1.89 |
|               | <i>SD</i> | .59     | .86  | .88  | .84  | .65  | .84  | .85  | .82  | .83  | .90  | .88  | .87  | .58     | .93  | .94  | .83  | .66  | .90  | .87  | .82  | .78  | .90  | .84  | .83  |
|               | $\omega$  | .75     | .90  | .91  | .88  | .74  | .86  | .86  | .85  | .81  | .83  | .84  | .83  | .78     | .92  | .92  | .89  | .77  | .88  | .87  | .87  | .81  | .84  | .82  | .83  |

*Note.* Scale scores for academic self-concepts, interests, and anxieties were computed as the mean of the respective item scores.

Reliability estimates were calculated as coefficient  $\omega$  (McDonald, 1999) and were based on congeneric first-order factor models.  $\omega$  can be interpreted in the same way as any other reliability coefficient, with values that can range from 0 (no reliability) to 1 (perfect reliability).

SA = academic self-concept; SM = mathematics self-concept; SF = French self-concept; SG = German self-concept; IA = academic interest; IM = mathematics interest; IF = French interest; IG = German interest; AA = academic anxiety; AM = mathematics anxiety; AF = French anxiety; AG = German anxiety.
